# Supplementary material for: Analysis of Total-Forms of Cyanotoxins Microcystins in Biological Matrices: A Methodological Review
Source: MDPI journal article supplement (doi:10.3390/toxins14080550), 2022-08-11
Supplement: s1 [file s1]

# Supplementary Materials: Analysis of Total-Forms of Cyanotoxins Microcystins in Biological Matrices: A Methodological Review

Pierre Bouteiller, Emilie Lance, Thierry Guérin and Ronel Biré

**Table S1.** Different genera of cyanobacteria known to produce microcystins classed by environment and morphotype (modified from [1], page 56).

| Environment                                                                                                                | Morphotype                       | Main genera of cyanobacteria proven producers | Other genera of cyanobacteria known producers                                                                                 |
|----------------------------------------------------------------------------------------------------------------------------|----------------------------------|-----------------------------------------------|-------------------------------------------------------------------------------------------------------------------------------|
| Fresh water and terrestrial environment (cyanobacteria in symbiosis with fungi to form lichens), brackish estuarine water. | Unicellular colonial             | <i>Microcystis</i>                            | <i>Aphanocapsa</i> , <i>Merismopedia</i> , <i>Radiocystis</i> , <i>Woronichinia</i>                                           |
|                                                                                                                            | Filamentous                      | <i>Planktothrix (Oscillatoria)</i>            | <i>Annamia</i> , <i>Geitlerinema</i> , <i>Leptolyngbya</i> , <i>Limnothrix</i> ,                                              |
|                                                                                                                            | Filamentous heterocyst           | with <i>Anabaena</i>                          | <i>Kamptonema/Phormidium/Microcoleus</i> , <i>Pseudanabaena</i> , <i>Spirulina</i> , <i>Trichodesmium</i> , <i>Plectonema</i> |
|                                                                                                                            | Filamentous heterocyst branching | with and <i>Hapalosiphon</i>                  | <i>Anabaenopsis</i> , <i>Calothrix</i> , <i>Nostoc</i> , <i>Trichormus</i><br><br><i>Fischerella</i>                          |

## Reference

1. ANSES. *Évaluation des risques liés aux cyanobactéries et leurs toxines dans les eaux douces*; 2020; p. 495.
